# Supplementary material
Source: ML conference proceedings conference paper supplement (https://openaccess.thecvf.com/content/cvpr_2016/html/Chang_Variable_Aperture_Light_2016_CVPR_paper.html)
Supplement: Supplementary file 1 [file Chang_Variable_Aperture_Light_2016_CVPR_supplemental.zip]

Archive with 10 entries (7 files):
- 0917-supp/
- 0917-supp/.DS_Store
- __MACOSX/
- __MACOSX/0917-supp/
- __MACOSX/0917-supp/._.DS_Store
- 0917-supp/0917-supp.mp4
- __MACOSX/0917-supp/._0917-supp.mp4
- 0917-supp/0917-supp.pdf
- __MACOSX/0917-supp/._0917-supp.pdf
- __MACOSX/._0917-supp
